# Supplementary material for: Ciliary dyslexia candidate genes DYX1C1 and DCDC2 are regulated by Regulatory Factor X (RFX) transcription factors through X-box promoter motifs
Source: PubMed Central journal article supplement — FASEB J. 2016 Jul 22;30(10):3578–87. doi: 10.1096/fj.201500124RR (PMC5024701; doi:10.1096/fj.201500124rr), 2016-07-22
Supplement: supp_fj.201500124RR_Supplemental_Table.pdf [file supp_fj.201500124RR_Supplemental_Table.pdf]

**Table S3.** Detailed description of the identified X-box motifs and their conservation based on PhyloP scores calculated from 100 vertebrates.

| Ensembl transcript         |                        |                                                 |                               |                  | RFX consensus<br>(full site only) |   |   |   |   |   |   | X-box<br>position                       | Conservation based on PhyloP100vert |       |       |      |          |                       |      |
|----------------------------|------------------------|-------------------------------------------------|-------------------------------|------------------|-----------------------------------|---|---|---|---|---|---|-----------------------------------------|-------------------------------------|-------|-------|------|----------|-----------------------|------|
| Transcript ID              | Start of<br>first exon | Strand<br>orientation<br>based on<br>transcript | Location, strand              | Sequence         | 1                                 | 2 | 3 | 4 | 5 | 6 | 7 | Relative to<br>first exon<br>start site | Min                                 | Max   | Range | Mean | Variance | Standard<br>deviation |      |
| DYX1C1-002<br>NM_001033559 | chr15:55790575         | Forward                                         | chr15:55790581..55790594<br>- | GCTTCC CT AGCAAC |                                   |   |   |   |   |   | x | -19 to<br>-6                            | 0,48                                | 4,74  | 4,27  | 2,32 | 1,89     | 1,37                  |      |
| DCDC2-001<br>NM_016356     | chr6:24358280          | Forward                                         | chr6:24360377..24360390,<br>- | GTTGCT AT GGAAAC |                                   |   | x | x | x |   | x | -2110 to<br>-2097                       | 0,18                                | 4,51  | 4,33  | 2,26 | 2,31     | 1,52                  |      |
|                            |                        | Reverse                                         | chr6:24360377..24360390,<br>+ | GTTTCC AT AGCAAC |                                   |   | x | x | x |   | x | -2110 to<br>-2097                       | 0,18                                | 4,51  | 4,33  | 2,26 | 2,31     | 1,52                  |      |
| KIAA0319-001<br>NM_014809  | chr6:24646383          | Forward                                         | chr6:24646440..24646453,<br>- | GTCGCC GT GGTAAC | x                                 | x |   |   |   |   | x | -70 to<br>-57                           | -0,05                               | 2,55  | 2,60  | 1,11 | 0,67     | 0,82                  |      |
|                            |                        | Reverse                                         | chr6:24646440..24646453,<br>+ | GTTACC AC GGCGAC |                                   |   |   |   |   |   | x | -70 to<br>-57                           | -0,05                               | 2,55  | 2,60  | 1,11 | 0,67     | 0,82                  |      |
|                            |                        | Reverse                                         | chr6:24648192..24648205,<br>+ | GCCTTT AA AGAAAC |                                   |   | x |   |   |   |   | x                                       | -1822 to<br>-1809                   | -1,28 | 0,85  | 2,13 | -0,03    | 0,48                  | 0,69 |
|                            |                        | Forward                                         | chr6:24647258..24647271,<br>- | ATAATT GA GGAAAC |                                   |   |   |   |   |   |   | x                                       | -888 to<br>-875                     | -0,84 | 1,94  | 2,78 | 0,15     | 0,41                  | 0,64 |
