# Supplementary material for: Ciliary dyslexia candidate genes DYX1C1 and DCDC2 are regulated by Regulatory Factor X (RFX) transcription factors through X-box promoter motifs
Source: PubMed Central journal article supplement — FASEB J. 2016 Jul 22;30(10):3578–87. doi: 10.1096/fj.201500124RR (PMC5024701; doi:10.1096/fj.201500124rr), 2016-07-22
Supplement: supp_fj.201500124RR_Supplemental_Tables.pdf [file supp_fj.201500124RR_Supplemental_Tables.pdf]

**Table S1.** X-box motif sequences used for the bioinformatics search with the EMBOSS fuzznuc tool. All sequence information is shown 5' to 3'.

| No. | Consensus                 | Organism         | References                        |
|-----|---------------------------|------------------|-----------------------------------|
| 1   | GTNRCC (0-3N) RGYAAC      | <i>H sapiens</i> | Chen, L., et al. <sup>1</sup>     |
| 2   | GTNRC (C/N) (0-3N) RGYAAC | <i>H sapiens</i> | Hsu, Y. C., et al. <sup>2</sup>   |
| 3   | RYYNYY WW RRNRAC          | <i>C elegans</i> | Efimenko, E., et al. <sup>3</sup> |
| 4   | RTHNYY WT RRNRAC          | <i>C elegans</i> | Efimenko, E., et al. <sup>3</sup> |
| 5   | GTHNYY AT RRNAAC          | <i>C elegans</i> | Efimenko, E., et al. <sup>3</sup> |
| 6   | GTTNCC NN (0-1N) GGHVAC   | <i>H sapiens</i> | Internal                          |
| 7   | RBNNYY NH RGHAAC          | <i>H sapiens</i> | Internal                          |

<sup>1</sup> Chen, L., Smith, L., Johnson, M. R., Wang, K., Diasio, R. B., and Smith, J. B. (2000) Activation of protein kinase C induces nuclear translocation of RFX1 and down-regulates c-myc via an intron 1 X box in undifferentiated leukemia HL-60 cells. *The Journal of biological chemistry* 275, 32227-32233

<sup>2</sup> Hsu, Y. C., Liao, W. C., Kao, C. Y., and Chiu, I. M. (2010) Regulation of FGF1 gene promoter through transcription factor RFX1. *The Journal of biological chemistry* 285, 13885-13895

<sup>3</sup> Efimenko, E., Bubb, K., Mak, H. Y., Holzman, T., Leroux, M. R., Ruvkun, G., Thomas, J. H., and Swoboda, P. (2005) Analysis of *xbx* genes in *C. elegans*. *Development* 132, 1923-1934

**Table S2.** Dyslexia candidate gene promoter construct cloning primers without restriction enzyme sequences and X-box wild type and mutant sequence information, respectively. All sequence information is shown 5' to 3'.

| Gene                     | Forward primers                                            | Reverse primers                                              | X-box wild type <sup>a</sup> | X-box mutant     |
|--------------------------|------------------------------------------------------------|--------------------------------------------------------------|------------------------------|------------------|
| <i>DYX1C1</i>            | TGAGTGTGCCCTAT<br>TTTGGG                                   | CAGTCTTCGTCTG<br>CTGCCAGC                                    | GTCGCC GT GGTAAC             | CACGAG GT TCCAAA |
| <i>DCDC2<sup>b</sup></i> | CTCCCTCTTCCTCC<br>AAACC<br>and<br>GTGTGCGCCAGGCT<br>GGAGTG | CCGTGACTCATGC<br>CTGTAAC<br>and<br>GAAACGAACGAGA<br>AACTGACG | GCTTCC CT AGCAAC             | ACTGGT AT GCAAAT |
| <i>KIAA0319</i>          | GGATGTCCACTGAA<br>TGCTGA                                   | ACAGGTGGAGCAA<br>GGTTGCAC                                    | GCTTCC CT AGCAAC             | CATTGA CT CTCAA  |

<sup>a</sup> For details of identification see Table S3.

<sup>b</sup> The *DCDC2* promoter construct was cloned by PCR sewing two regions together (chr6:24,359,852-24,360,507 and chr6:24,358,078-24,358,893) to avoid a TA-repeat region located at: chr6:24,358,894-24,359,851 in Hg19.
